# Supplementary material for: Seasonal Changes of Mélange Thickness Coincide WithGreenland Calving Dynamics
Source: Research Square preprint supplement (doi:10.21203/rs.3.rs-3893234/v1), 2024-01-25
Supplement: Supplementary file 1 [file 58517a4eebbcafb446a85bb5.xlsx]

## Sheet: Termini_coregis
ID	Official Name	Latitude of melange	Longitude of melange	Mosaic DEM Tile	ArcticDEM_date	ArcticDEM acq times (stereo pair within 1min)	Terminus advance/retreat	Coregistration offset (m)	Tidal elevation (m)	elev correction (m)	Sea Level offset (m)	final elev correction (m)	Raw freeboard height at terminus Z0 (m)	Corrected freeboard height at terminus Z0 (m)
1	Tuttulikassaap Sermia (Hayes Glacier)	74.8946	-57.1646	24_37_2_2_2m_v4.1	20160326	18:41:27	advance	2.33837	0.29	-2.62837	-1.75	1.75	8.2	9.95
					20170321	18:40:00	advance	3.92609	-0.16	-3.76609	0.25	-0.25	16.9	16.65
					20180330	18:54:33	advance	1.41327	-0.41	-1.00327	-2.75	2.75	3	5.75
					20190311	18:37:55	advance	4.93	0.44	-5.37	2.25	-2.25	8.9	6.65
2	Hayes Glacier 2	74.8885	-57.019	24_37_2_2_2m_v4.1	20200425	19:26:47	advance	-0.959369	-0.17	1.12937	-2.25	2.25	3.33	5.58
					20180605	00:56:36	retreat	0.410662	-0.33	-0.0806615	-2.25	2.25	1.42	3.67
					20200318	19:18:37	retreat	1.36985	-0.4	-0.969849	-2.25	2.25	0.52	2.77
3	Hayes Glacier SS	74.7822	-56.743	24_37_2_2_2m_v4.1	20180316	19:21:36	advance	3.05998	-0.33	-2.72998	-1	1	8.2	9.2
					20180605	00:56:36	advance	1.66925	-0.33	-1.33925	-4.25	4.25	4	8.25
					20200425	19:26:47	advance	1.4597	-0.17	-1.2897	-2.5	2.5	5.8	8.3
					20170807	19:06:14	retreat	3.06242	-0.46	-2.60242	0.5	-0.5	3.9	3.4
4	Nunatakassaap Sermia (Alison Glacier)	74.6249	-56.432	24_37_2_2_2m_v4.1	20140330	16:37:50	advance	1.49075	0.52	-2.01075	-1.25	1.25	15.93	17.18
					20150406	16:19:11	advance	0.30386	0.46	-0.76386	0.75	-0.75	11.81	11.06
					20150518	16:57:11	advance	0.416933	0.16	-0.576933	-2.5	2.5	12.66	15.16
					20160407	18:59:11	advance	1.69901	-0.42	-1.27901	-0.25	0.25	17.6	17.85
					20170305	16:45:14	advance	1.54494	-0.19	-1.35494	0.5	-0.5	16.02	15.52
					20170616	16:27:52	advance	1.49726	-0.39	-1.10726	0.5	-0.5	14.66	14.16
					20140929	16:46:33	retreat	1.78052	0.58	-2.36052	1.25	-1.25	2.49	1.24
					20150728	17:20:19	retreat	1.85029	-0.6	-1.25029	0	0	1.1	1.1
					20160914	17:04:19	retreat	0.431924	-0.31	-0.121924	-0.75	0.75	1.42	2.17
5	Upernavik Isstrøm N	72.9899	-54.4826	22_37_2_2_2m_v4.1	20190419	18:21:52	advance	-1.6914	-0.3	1.9914	3.75	1.9914	14.9	16.8914
					20210415	16:30:49	advance	-1.15046	0.2	0.950457	1.75	0.950457	9.7	10.6505
					20150816	17:24:00	retreat	-1.98543	0.18	1.80543	-2	2	-0.63	1.37
6	Kangilliup Sermia (Rink Isbræ)	71.632	-51.9296	21_38_1_2_2m_v4.1	20170526	00:47:04	advance	0.768498	1.08	-1.8485	1.5	-1.5	7.31	5.81
					20190309	16:21:57	advance	1.62779	0.63	-2.25779	6.25	-2.25779	9.83	7.57221
					20200506	16:10:00	advance	2.93514	-0.38	-2.55514	3	-2.55514	11.61	9.05486
7	Kangilleq	70.7385	-50.8543	20_38_1_2_2m_v4.1	20140603	00:01:29	retreat	-2.55	-0.15	2.7	1.75	-1.75	4.5	2.75
8	Sermeq Kujalleq (Jakobshavn Isbræ)	69.1616	-49.7392	18_39_1_1_2m_v4.1	20180918	18:19:35	advance	3.76155	0.53	-4.29155	5.5	-4.29155	23.5	19.2084
					20190327	15:19:27	advance	5.12503	0.07	-5.19503	10.25	-5.19503	32	26.805
					20191009	15:45:22	advance	1.41271	-0.42	-0.992714	4.25	-0.992714	22.3	21.3073
					20140524	14:42:28	retreat	3.90278	-0.93	-2.97278	2.25	-2.25	5	2.75
					20150521	16:55:48	retreat	2.49417	-0.15	-2.34417	0	0	7.7	7.7
					20180627	15:57:32	retreat	3.8785	-0.7	-3.1785	1.5	-1.5	5.4	3.9
					20200507	15:33:49	retreat	4.56293	-0.5	-4.06293	4	-4	8.1	4.1
					20210504	14:51:08	retreat	1.57758	-0.58	-0.997579	0	0	4.5	4.5
9	Unnamed Deception	67.6599	-33.2213	16_45_2_2_2m_v4.1	20160621	16:36:55	advance	-4.00469	0.52	3.48469	-1.75	3.48469	12	15.4847
					20190329	14:08:15	advance	4.3	0.09	-4.39	7.25	-4.39	23.9	19.51
					20200403	16:36:20	advance	-1.6701	0.09	1.5801	-0.5	1.5801	7.5	9.0801
					20210430	16:43:21	advance	-0.741946	-0.35	1.09195	2.5	1.09195	17.1	18.1919
					20170815	13:55:48	retreat	-0.373595	0.39	-0.0164054	-0.25	0.25	4.3	4.55
					20180801	17:07:44	retreat	1.5	-0.35	-1.15	0.25	-0.25	6.7	6.45
10	Unnamed Uunartit Islands	67.4304	-33.3686	16_45_2_2_2m_v4.1	20180807	13:58:43	advance	1.59226	0.83	-2.42226	6.5	-2.42226	12.7	10.2777
					20190329	16:44:29	advance	1.63117	-0.16	-1.47117	2.5	-1.47117	10.3	8.82883
					20200402	13:58:20	advance	-0.590234	0.08	0.510234	3.5	0.510234	15.2	15.7102
11	Helheim Glacier	66.3143	-37.7525	15_44_1_1_2m_v4.1	20140611	13:40:00	retreat	3.35633	-0.63	-2.72633	2.5	-2.5	7.65	5.15
					20160625	13:52:25	retreat	0.843357	-0.5	-0.343357	-2	2	3.55	5.55
12	Ikertivaq S	65.4625	-39.8728	14_43_1_1_2m_v4.1	20140710	14:08:37	retreat	0.0316363	-0.1	0.0683637	-0.75	0.75	1.62	2.37
					20180815	14:19:05	retreat	-2.47421	-0.99	3.46421	-3.75	3.75	-2.8	0.95
13	Koge Bugt C	65.0721	-41.0223	13_42_2_2_2m_v4.1	20150702	13:57:16	advance	-0.266941	-1.36	1.62694	-1.5	1.62694	11.45	13.0769
					20210511	17:25:27	retreat	1.44133	0.8	-2.24133	2.75	-2.24133	7.1	4.85867
14	Koge Bugt S	64.9285	-41.0168	13_42_2_2_2m_v4.1	20160410	13:55:47	advance	2.55915	-1.37	-1.18915	0.5	-0.5	14.1	13.6
					20190214	14:42:15	advance	1.00807	0.43	-1.43807	3	-1.43807	14.42	12.9819
					20160720	17:06:06	retreat	-2.05277	0.4	1.65277	0.5	1.65277	1.47	3.12277
					20170727	16:56:16	retreat	-2.55632	-1.13	3.68632	-1.5	3.68632	-0.63	3.05632
15	Gråulv	64.3069	-41.483	12_42_2_2_2m_v4.1	20160303	13:57:40	advance	3.11	0.34	-3.45	4.5	-3.45	10.2	6.75
					20191023	17:00:02	retreat	-1.74895	0.55	1.19895	-4	4	-1.2	2.8
16	Gyldenlove	64.2688	-41.4926	12_42_2_2_2m_v4.1	20150908	15:36:33	advance	-2.44401	0.75	1.69401	-1	1.69401	6.3	7.99401
					20160303	13:57:40	advance	4.40487	0.34	-4.74487	5.25	-4.74487	17.6	12.8551
					20200311	13:55:00	advance	1.64	-1.53	-0.11	3.75	-0.11	8	7.89
					20210219	17:08:34	advance	0.797509	-0.61	-0.187509	-1.25	1.25	9.27	10.52
					20191023	17:00:02	retreat	-3.08403	0.55	2.53403	-3.5	3.5	0.46	3.96
17	A.P. Bernstorff Glacier	63.7895	-41.6382	12_42_1_2_2m_v4.1	20140407	13:42:47	advance	-2.14754	0.26	1.88754	-2.25	2.25	12.81	15.06
					20140809	14:04:04	retreat	-2.01512	-0.64	2.65512	-1.75	2.65512	1.97	4.62512
					20141016	13:55:34	retreat	-3.80923	0.53	3.27923	-1.75	3.27923	1.1	4.37923
					20160807	14:04:45	retreat	-4.11707	-0.59	4.70707	-1.5	4.70707	2.3	7.00707
18	Storebjørn	63.7486	-41.6663	12_42_1_2_2m_v4.1	20140407	13:42:47	advance	-0.00145561	0.26	-0.258544	-1.25	1.25	5.9	7.15
					20140809	14:04:04	retreat	0.0502486	-0.64	0.589751	-1	1	4.67	5.67
					20141016	13:55:34	retreat	-2.60008	0.53	2.07008	-1.75	2.07008	4.13	6.20008
					20150624	15:30:16	retreat	-1.95645	0.04	1.91645	-4.5	4.5	-4.3	0.2
19	Mogens Heinesen S	62.4593	-42.9596	10_42_2_1_2m_v4.1	20140816	14:10:20	retreat	-3.81691	0.19	3.62691	-2.75	3.62691	3.46	7.08691
20	Nansen Glacier	75.7148	-58.9725	25_37_2_1_2m_v4.1	20170401	16:34:24	retreat	2.70195	0.15	-2.85195	-0.75	0.75	5.36	6.11
21	Kjer Glacier	75.1165	-57.968	25_37_1_1_2m_v4.1	20160403	18:53:13	advance	-2.72246	-0.55	3.27246	-2.75	3.27246	9	12.2725
					20191002	17:39:55	retreat	-2.32023	0.96	1.36023	-0.75	1.36023	-0.11	1.25023
					20200709	00:02:26	retreat	-0.382703	-0.47	0.852703	2.5	0.852703	8.46	9.3127
22	Sermeq (Upernavik Isstrøm)	72.9368	-54.4736	22_37_2_2_2m_v4.1	20170409	16:12:07	advance	3.28291	0.29	-3.57291	-0.5	0.5	23.1	23.6
					20180408	18:45:12	advance	3.99396	-0.19	-3.80396	-2.25	2.25	9.1	11.35
					20190311	18:38:14	advance	3.64022	0.35	-3.99022	2.75	-2.75	29.25	26.5
					20200324	15:54:02	advance	2.96888	0.7	-3.66888	1.25	-1.25	15.2	13.95
					20150924	17:30:03	retreat	2.09474	-0.44	-1.65474	2.25	-1.65474	3.86	2.20526
					20160713	16:44:11	retreat	2.94	-0.47	-2.47	3.5	-2.47	5.3	2.83
					20170812	16:27:40	retreat	2.78857	0.19	-2.97857	2	-2	4.1	2.1
23	Apuseerajik (Fenris Glacier)	66.3259	-37.4551	15_44_1_1_2m_v4.1	20151018	14:13:35	advance	4.24906	-0.47	-3.77906	0.5	-0.5	12.2	11.7
					20170701	17:08:39	retreat	3.7239	-0.38	-3.3439	-1.5	1.5	0.9	2.4
24	Nigertiip Apusiia (Midgård Glacier)	66.4291	-36.7843	15_44_1_2_2m_v4.1	20200402	13:44:13	advance	1.61697	0.29	-1.90697	3	-1.90697	11.8	9.89303
					20210408	16:55:56	advance	-0.189447	0.77	-0.580553	0.25	-0.25	7.8	7.55
					20190605	16:46:05	retreat	0.0677594	-0.44	0.372241	0.25	0.372241	2.66	3.03224
25	Krusse Fj	67.2213	-33.5955	16_45_2_2_2m_v4.1	20200403	16:36:34	advance	-0.259961	0.1	0.159961	-1.5	1.5	10	11.5
					20210427	14:09:07	advance	-0.152331	-0.9	1.05233	-2.75	2.75	5.73	8.48
					20181015	13:58:24	retreat	3.04613	-0.17	-2.87613	2.75	-2.75	2.83	0.08
26	Sermeq Kujalleq	69.9952	-50.5879	19_38_1_2_2m_v4.1	20150522	16:19:06	retreat	2.36013	0.12	-2.48013	2.25	-2.25	4.36	2.11
27	Sermeq Kujalleq (Store Glacier)	70.3492	-50.6731	19_38_2_2_2m_v4.1	20190524	18:00:24	retreat	0.185567	-0.14	-0.0455674	-1	1	4.75	5.75
28	Nuussuup Sermia (Kong Oscar Glacier)	75.9456	-59.9524	26_37_1_1_2m_v4.1	20140704	17:47:22	advance	-1.49115	0.13	1.36115	-2.75	2.75	8.45	11.2
					20170611	03:56:37	advance	-1.60629	0.88	0.726292	-2.75	2.75	7.22	9.97
					20180526	19:50:31	advance	0.191981	-0.41	0.218019	-1	1	12.8	13.8
					20190426	16:55:22	advance	2.0119	-0.27	-1.7419	2.75	-1.7419	8.8	7.0581
29	Zachariae Isstrøm	78.913	-20.141	30_45_1_2_2m_v4.1	20140726	12:34:40	retreat	3.90671	0.37	-4.27671	3.5	-3.5	6.3	2.8
30	Daugaard-Jensen Glacier	71.9309	-28.3269	22_46_1_2_2m_v4.1	20200505	13:27:03	advance	-2.0993	0.27	1.8293	-2.75	2.75	4.2	6.95
31	Kangerlussuaq Glacier	68.5393	-32.6816	18_45_1_2_2m_v4.1	20150408	13:15:35	advance	1.53787	-0.86	-0.677869	4.5	-0.677869	17	16.3221
					20190321	13:59:08	advance	-0.642154	-1.1	1.74215	0.25	1.74215	16.87	18.6122
					20190501	13:53:43	advance	0.475145	0.11	-0.585145	3.25	-0.585145	24.79	24.2049
					20200505	13:26:33	advance	-1.21088	-0.16	1.37088	0.25	1.37088	18.61	19.9809
					20210403	17:10:16	advance	-0.275673	-0.63	0.905673	1.75	0.905673	26.75	27.6557
					20210519	13:52:43	advance	-0.896255	-0.04	0.936255	0.5	0.936255	23.62	24.5563
					20150818	15:27:34	retreat	-2.78886	-0.78	3.56886	-3.25	3.56886	5	8.56886
					20160727	13:58:01	retreat	0.223203	0.39	-0.613203	2.5	-0.613203	10.58	9.9668
32	K.J.V. Steenstrup Nordre Bræ	66.4771	-34.4614	15_45_2_2_2m_v4.1	20180714	13:55:18	retreat	1.18242	-1.43	0.247581	-0.75	0.75	0.06	0.81
					20190718	16:39:26	retreat	0.59871	0.15	-0.74871	-2.25	2.25	-0.2	2.05
					20200821	13:49:34	retreat	1.33707	-1.47	0.132927	0.25	0.132927	3.1	3.23293

## Sheet: Termini_thickness
1	Tuttulikassaap Sermia (Hayes Glacier)	491.046	36.9444		2	Hayes Glacier 2	512.78	21.5		3	Hayes Glacier SS	517.008	43.3333		4	Nunatakassaap Sermia (Alison Glacier)	665.097	35.4		5	Upernavik Isstrøm N	600.151	27.7333		6	Kangilliup Sermia (Rink Isbræ)	436.785	8.52381		7	Kangilleq	258.737	45.8182		8	Sermeq Kujalleq (Jakobshavn Isbræ)	891.903	32.5652		9	Unnamed Deception	445.847	39.3889		10	Unnamed Uunartit Islands	299.004	16.4
width (m)	Terminus thickness (m)	width	Error (m)		width (m)	Terminus thickness (m)	width	Error (m)		width (m)	Terminus thickness (m)	width	Error (m)		width (m)	Terminus thickness (m)	width	Error (m)		width (m)	Terminus thickness (m)	width	Error (m)		width (m)	Terminus thickness (m)	width	Error (m)		width (m)	Terminus thickness (m)	width	Error (m)		width (m)	Terminus thickness (m)	width	Error (m)		width (m)	Terminus thickness (m)	width	Error (m)		width (m)	Terminus thickness (m)	width	Error (m)
0	448.739	0	69		0	478.624	0	55		0	504.585	0	16		0	491.26	0	26		0	551.786	0	0		0	390.955	0	47		0	243.238	0	82		0	857.323	0	40		0	313.196	0	95		0	301.328	0	23
168.943	448.936	168.943	67		167.376	500.775	167.376	46		162.746	512.047	162.746	18		166.928	521.589	166.928	32		199.477	652.811	199.477	0		234.704	379.47	234.704	94		172.644	266.508	172.644	51		157.928	877.943	157.928	30		174.529	358.618	174.529	76		155.77	347.651	155.77	22
337.886	455.218	337.886	67		334.752	527.631	334.752	36		325.493	518.853	325.493	34		333.856	553.545	333.856	36		398.954	717.667	398.954	0		469.408	362.557	469.408	2		345.287	296.596	345.287	49		315.856	882.522	315.856	24		349.058	432.9	349.058	48		311.541	349.17	311.541	18
506.83	461.95	506.83	66		502.128	545.303	502.128	28		488.239	526.777	488.239	52		500.784	579.775	500.784	62		598.431	674.952	598.431	0		704.113	347.579	704.113	2		517.931	318.102	517.931	32		473.784	886.227	473.784	28		523.586	469.988	523.586	48		467.311	356.76	467.311	16
675.773	464.148	675.773	64		669.504	555.737	669.504	20		650.986	533.781	650.986	65		667.712	604.593	667.712	96		797.908	664.458	797.908	0		938.817	336.591	938.817	2		690.574	322.336	690.574	21		631.712	888.422	631.712	45		698.115	499.078	698.115	52		623.081	352.151	623.081	15
844.716	474.833	844.716	64		836.88	560.365	836.88	16		813.732	541.342	813.732	75		834.64	625.451	834.64	79		997.385	635.345	997.385	0		1173.52	302.035	1173.52	2		863.218	308.92	863.218	33		789.64	896.432	789.64	28		872.644	512.477	872.644	53		778.851	345.009	778.851	15
1013.66	475.501	1013.66	51		1004.26	564.175	1004.26	13		982.727	543.281	982.727	52		1001.57	660.643	1001.57	48		1196.86	589.776	1196.86	0		1408.23	379.31	1408.23	2		1035.86	287.611	1035.86	51		947.568	902.38	947.568	23		1047.17	512.844	1047.17	53		934.622	323.404	934.622	14
1182.6	486.213	1182.6	46		1171.63	564.005	1171.63	10		1151.72	535.191	1151.72	52		1168.5	680.739	1168.5	45		1386.08	635.855	1386.08	0		1642.93	395.141	1642.93	2		1208.51	275.355	1208.51	63		1105.5	909.102	1105.5	22		1221.7	515.684	1221.7	53		1090.39	311.517	1090.39	14
1351.55	491.702	1351.55	39		1339.01	550.09	1339.01	11		1320.72	518.063	1320.72	49		1335.42	698.243	1335.42	40		1575.3	609.57	1575.3	0		1877.63	455.385	1877.63	2		1376.39	230.282	1376.39	54		1263.42	916.502	1263.42	26		1396.23	506.805	1396.23	49		1246.16	301.437	1246.16	14
1520.49	482.421	1520.49	26		1506.38	530.352	1506.38	12		1489.71	500.936	1489.71	45		1498.1	708.395	1498.1	31		1764.52	479.06	1764.52	28		2043.75	446.197	2043.75	2		1544.27	185.829	1544.27	38		1421.35	924.52	1421.35	27		1570.76	506.702	1570.76	46		1401.93	290.843	1401.93	15
1689.43	492.192	1689.43	24		1673.76	509.482	1673.76	12		1658.71	484.622	1658.71	31		1660.78	716.578	1660.78	24		1953.74	597.011	1953.74	64		2209.86	525.869	2209.86	2		1712.15	111.327	1712.15	30		1579.28	932.39	1579.28	25		1745.29	495.297	1745.29	35		1557.7	264.303	1557.7	15
1896.6	484.17	1896.6	17		1841.14	463.721	1841.14	14		1658.71	484.622	1658.71	31		1823.46	720.811	1823.46	23		2142.96	565.353	2142.96	80		2375.97	600	2375.97	2			258.737		45.8182		1742.39	940.49	1742.39	26		1919.82	491.094	1919.82	28		1713.47	254.501	1713.47	16
2103.77	493.878	2103.77	13		2008.51	414.332	2008.51	14			517.008		43.3333		1986.13	722.318	1986.13	23		2332.18	566.011	2332.18	76		2542.08	582.237	2542.08	2							1905.49	946.284	1905.49	26		2094.35	471.015	2094.35	15		1869.24	245.879	1869.24	17
2310.94	499.538	2310.94	11		2008.51	414.332	2008.51	14							2148.81	720.873	2148.81	21		2521.39	531.306	2521.39	84		2708.2	544.401	2708.2	2							2068.6	938.179	2068.6	19		2268.87	458.927	2268.87	14		2025.01	220.555	2025.01	16
2518.11	513.449	2518.11	11			512.78		21.5							2311.49	724.111	2311.49	20		2521.39	531.306	2521.39	84		2874.31	533.655	2874.31	2							2231.71	938.356	2231.71	12		2443.4	429.487	2443.4	11		2025.01	220.555	2025.01	16
2725.28	542.876	2725.28	10												2474.16	733.872	2474.16	20			600.151		27.7333		3040.42	509.318	3040.42	2							2394.81	934.083	2394.81	13		2617.93	406.703	2617.93	11			299.004		16.4
2932.45	561.53	2932.45	10												2636.84	736.888	2636.84	20							3206.54	477.653	3206.54	2							2557.92	917.417	2557.92	24		2792.46	322.213	2792.46	11
2932.45	561.53	2932.45	10												2799.52	734.987	2799.52	20							3372.65	449.016	3372.65	2							2721.03	911.06	2721.03	27		2792.46	322.213	2792.46	11
	491.046		36.9444												2962.2	683.631	2962.2	21							3538.76	411.955	3538.76	2							2884.13	897.595	2884.13	36			445.847		39.3889
															2962.2	683.631	2962.2	21							3704.87	371.583	3704.87	2							3047.24	851.002	3047.24	46
																665.097		35.4							3704.87	371.583	3704.87	2							3210.35	818.569	3210.35	58
																										436.785		8.52381							3373.45	773.489	3373.45	72
																																			3373.45	773.489	3373.45	72
																																				891.903		32.5652
11	Helheim Glacier	682.209	54.3793		12	Ikertivaq S	130.787	54.88		13	Koge Bugt C	433.163	42.2632		14	Koge Bugt S	451.887	33.7857		15	Gråulv	438.977	62.1538		16	Gyldenlove	414.786	26.6		17	A.P. Bernstorff Glacier	474.155	68.125		18	Storebjørn	130.482	24.1429		19	Mogens Heinesen S	313.174	73.8889		20	Nansen Glacier	352.688	20.6111
width (m)	Terminus thickness (m)	width	Error (m)		width (m)	Terminus thickness (m)	width	Error (m)		width (m)	Terminus thickness (m)	width	Error (m)		width (m)	Terminus thickness (m)	width	Error (m)		width (m)	Terminus thickness (m)	width	Error (m)		width (m)	Terminus thickness (m)	width	Error (m)		width (m)	Terminus thickness (m)	width	Error (m)		width (m)	Terminus thickness (m)	width	Error (m)		width (m)	Terminus thickness (m)	width	Error (m)		width (m)	Terminus thickness (m)	width	Error (m)
0	554.347	0	74		0	402.364	0	69		0	356.158	0	41		0	425.469	0	28		0	391.978	0	35		0	642.65	0	37		0	261.29	0	47		0	96.9659	0	13		0	250.144	0	13		0	344.948	0	11
171.547	628.431	171.547	46		180.667	360.26	180.667	87		174.105	377.682	174.105	41		212.91	434.982	212.91	40		173.022	442.432	173.022	37		209.032	610.5	209.032	36		223.907	318.425	223.907	61		163.229	107.632	163.229	14		213.683	323.332	213.683	72		200.635	357.334	200.635	11
343.093	698.59	343.093	19		361.334	283.175	361.334	96		348.21	416.976	348.21	41		425.82	446.246	425.82	32		346.043	507.685	346.043	53		418.064	551.188	418.064	35		447.813	375.867	447.813	73		326.458	118.825	326.458	15		427.366	366.265	427.366	95		401.27	366.967	401.27	12
514.64	714.161	514.64	51		542.001	256.491	542.001	96		522.315	406.603	522.315	41		638.73	456.187	638.73	26		519.065	510.655	519.065	70		627.097	457.981	627.097	22		671.72	410.092	671.72	68		489.686	136.198	489.686	17		641.049	378.039	641.049	68		601.904	375.528	601.904	12
686.187	728.435	686.187	68		722.667	168.426	722.667	96		696.42	434.633	696.42	41		851.64	465.529	851.64	24		692.086	525.545	692.086	86		836.129	427.669	836.129	21		895.627	438.06	895.627	58		652.915	136.977	652.915	16		854.732	358.836	854.732	55		802.539	379.202	802.539	15
857.734	732.7	857.734	96		903.334	111.131	903.334	30		870.525	418.453	870.525	41		1064.55	474.364	1064.55	20		865.108	497.749	865.108	86		1070.26	378.057	1070.26	22		1119.53	465.805	1119.53	42		816.144	139.535	816.144	17		1073.66	329.99	1073.66	69		1003.17	382.898	1003.17	17
1029.28	735.261	1029.28	98		1084	100.364	1084	30		1044.63	443.544	1044.63	41		1277.46	482.471	1277.46	22		1038.13	482.49	1038.13	80		1304.4	322.704	1304.4	22		1343.44	481.533	1343.44	80		979.373	143.429	979.373	17		1292.58	291.976	1292.58	93		1203.81	389.139	1203.81	27
1200.83	737.027	1200.83	94		1264.67	123.89	1264.67	30		1218.73	427.881	1218.73	41		1490.37	488.468	1490.37	32		1211.15	460.319	1211.15	62		1538.53	279.227	1538.53	19		1567.35	495.614	1567.35	76		1142.6	147.926	1142.6	18		1511.51	259.991	1511.51	100		1404.44	387.896	1404.44	29
1372.37	736.273	1372.37	80		1445.33	135.005	1445.33	30		1392.84	448.707	1392.84	45		1703.28	492.87	1703.28	37		1381.71	436.488	1381.71	46		1772.67	238.94	1772.67	26		1743.16	509.303	1743.16	59		1305.83	152.067	1305.83	18		1511.51	259.991	1511.51	100		1605.08	388.606	1605.08	54
1543.92	734.126	1543.92	59		1626	88.9947	1626	30		1566.94	468.358	1566.94	45		1916.19	489.854	1916.19	52		1552.26	412.519	1552.26	31		1772.67	238.94	1772.67	26		1918.98	521.123	1918.98	45		1469.06	151.622	1469.06	20							1805.71	387.979	1805.71	67
1715.47	731.83	1715.47	39		1806.67	82.099	1806.67	30		1741.05	449.769	1741.05	45		2185.12	473.14	2185.12	43		1722.82	367.986	1722.82	62							2094.79	540.405	2094.79	41		1673.44	146.243	1673.44	25							2011.51	373.413	2011.51	20
1887.01	726.981	1887.01	25		1987.34	64.1806	1987.34	30		1915.15	465.435	1915.15	45		2454.04	452.819	2454.04	25		1893.37	335.426	1893.37	80							2270.61	544.231	2270.61	58		1877.81	123.478	1877.81	40							2217.31	364.502	2217.31	14
2058.56	724.684	2058.56	42		2168	74.55	2168	30		2089.26	446.025	2089.26	45		2722.97	372.012	2722.97	46		1893.37	335.426	1893.37	80							2446.42	556.628	2446.42	82		2082.19	112.928	2082.19	54							2423.11	352.101	2423.11	12
2230.11	723.241	2230.11	34		2348.67	58.2	2348.67	30		2279.06	457.054	2279.06	45		2722.97	372.012	2722.97	46												2622.24	567.275	2622.24	100		2082.19	112.928	2082.19	54							2628.9	334.871	2628.9	13
2401.65	717.781	2401.65	26		2529.34	0	2529.34	10		2468.87	463.424	2468.87	41																	2798.06	550.413	2798.06	100												2834.7	314.371	2834.7	13
2573.2	716.617	2573.2	25		2710	0	2710	10		2658.67	462.779	2658.67	41																	2798.06	550.413	2798.06	100												3040.5	295.535	3040.5	14
2725.62	715.597	2725.62	61		2890.67	156.553	2890.67	30		2848.48	438.892	2848.48	41																																3246.3	276.548	3246.3	15
2878.04	712.469	2878.04	44		3071.34	138.861	3071.34	30		3038.28	423.865	3038.28	41																																3246.3	276.548	3246.3	15
3030.47	707.137	3030.47	37		3252	108.861	3252	47		3038.28	423.865	3038.28	41
3182.89	706.505	3182.89	42		3432.67	132.313	3432.67	54
3335.31	702.198	3335.31	43		3613.34	106.165	3613.34	91
3487.73	691.105	3487.73	38		3794	82.3426	3794	93
3640.15	681.645	3640.15	21		3974.67	78.5134	3974.67	93
3792.57	666.304	3792.57	11		4155.34	78.4674	4155.34	100
3945	636.777	3945	27		4155.34	78.4674	4155.34	100
4097.42	598.582	4097.42	77			130.787		54.88
4249.84	554.658	4249.84	100
4402.26	535.304	4402.26	100
4402.26	535.304	4402.26	100
	682.209		54.3793
21	Kjer Glacier	305.405	36.3636		22	Sermeq (Upernavik Isstrøm)	626.838	43.8824		23	Apuseerajik (Fenris Glacier)	596.583	54.2308		24	Nigertiip Apusiia (Midgård Glacier)	211.588	31.8		25	Krusse Fj	129.998	11.2		26	Sermeq Kujalleq	526.217	110.556		27	Sermeq Kujalleq (Store Glacier)	608.163	62.1333		28	Nuussuup Sermia (Kong Oscar Glacier)	684.672	23.75		29	Zachariae Isstrøm	467.351	46.1635		30	Daugaard-Jensen Glacier	459.491	91.4545
width (m)	Terminus thickness (m)	width	Error (m)		width (m)	Terminus thickness (m)	width	Error (m)		width (m)	Terminus thickness (m)	width	Error (m)		width (m)	Terminus thickness (m)	width	Error (m)		width (m)	Terminus thickness (m)	width	Error (m)		width (m)	Terminus thickness (m)	width	Error (m)		width (m)	Terminus thickness (m)	width	Error (m)		width (m)	Terminus thickness (m)	width	Error (m)		width (m)	Terminus thickness (m)	width	Error (m)		width (m)	Terminus thickness (m)	width	Error (m)
0	276.446	0	41		0	520.946	0	82		0	446.514	0	63		0	125.733	0	37		0	126.4	0	11		0	528.706	0	104		0	557.653	0	37		0	555.41	0	10		0	344.906	0	31		0	346.612	0	65
171.59	296.942	171.59	30		179.057	548.471	179.057	58		223.586	496.727	223.586	82		210.307	156.401	210.307	35		163.796	149.074	163.796	11		198.2	533.851	198.2	109		175.292	523.585	175.292	37		164.724	577.767	164.724	10		154.223	346.69	154.223	34		181.578	433.046	181.578	65
343.181	314.887	343.181	23		358.114	590.76	358.114	33		447.172	543.383	447.172	82		420.614	189.226	420.614	33		327.591	165.278	327.591	11		396.399	541.096	396.399	115		350.583	709.647	350.583	37		329.447	609.746	329.447	10		308.446	352.043	308.446	36		363.156	486.844	363.156	65
514.771	331.8	514.771	41		537.171	616.076	537.171	22		670.758	585.683	670.758	82		630.921	211.74	630.921	32		491.387	168.578	491.387	11		594.599	549.203	594.599	112		525.875	605.914	525.875	37		494.171	632.538	494.171	10		462.668	358.5	462.668	37		544.734	527.747	544.734	65
686.362	338.548	686.362	54		716.228	667.042	716.228	17		894.345	619.175	894.345	93		841.229	216.062	841.229	30		655.182	158.41	655.182	11		792.798	544.399	792.798	112		701.166	543.192	701.166	37		658.894	655.714	658.894	10		616.891	361.403	616.891	38		726.312	524.545	726.312	82
857.952	353.024	857.952	79		895.285	677.846	895.285	35		1117.93	644.914	1117.93	93		1051.54	249.733	1051.54	30		818.978	145.549	818.978	11		1051.69	533.66	1051.69	112		876.458	719.875	876.458	59		823.618	688.703	823.618	10		771.114	309.969	771.114	107		907.89	523.179	907.89	100
1029.54	354.251	1029.54	59		1074.34	693.38	1074.34	61		1279.5	641.368	1279.5	30		1242.66	246.221	1242.66	31		1004.04	125.99	1004.04	11		1310.58	517.106	1310.58	109		1051.75	703.629	1051.75	100		988.341	712.555	988.341	10		925.337	311.799	925.337	107		1089.47	518.45	1089.47	100
1201.13	354.302	1201.13	48		1253.4	707.03	1253.4	83		1441.08	638.678	1441.08	30		1433.78	265.465	1433.78	30		1189.1	104.177	1189.1	11		1569.46	493.966	1569.46	111		1227.04	699.414	1227.04	93		1153.06	708.485	1153.06	30		1079.56	314.172	1079.56	108		1271.05	515.919	1271.05	100
1372.72	350.878	1372.72	35		1432.46	709.667	1432.46	100		1602.65	635.924	1602.65	30		1624.9	227.648	1624.9	30		1374.17	87.0272	1374.17	11		1569.46	493.966	1569.46	111		1417.88	686.483	1417.88	93		1362.93	711.821	1362.93	30		1233.78	368.065	1233.78	109		1452.62	510.421	1452.62	100
1544.31	346.23	1544.31	28		1611.51	709.403	1611.51	85		1764.23	629.987	1764.23	30		1624.9	227.648	1624.9	30		1559.23	69.4955	1559.23	13							1608.73	672.741	1608.73	93		1572.8	714.569	1572.8	30		1388	331.928	1388	111		1634.2	502.624	1634.2	99
1715.9	337.382	1715.9	17		1821.34	698.452	1821.34	72		1925.8	626.748	1925.8	30																	1799.57	605.292	1799.57	93		1782.66	719.014	1782.66	40		1542.23	337.79	1542.23	112		1815.78	500.961	1815.78	100
1887.49	329.206	1887.49	12		2031.17	672.66	2031.17	53		2087.37	623.239	2087.37	30																	1990.41	543.589	1990.41	93		1992.53	724.18	1992.53	40		1696.45	378.683	1696.45	38		1997.36	491.635	1997.36	100
2059.08	314.529	2059.08	10		2241	642.331	2241	29		2087.37	623.239	2087.37	30																	2181.25	526.075	2181.25	41		2202.39	729.572	2202.39	40		1850.67	381.479	1850.67	39		2190.64	479.979	2190.64	100
2230.68	304.973	2230.68	10		2450.83	604.41	2450.83	16																						2372.09	512.676	2372.09	41		2412.26	734.843	2412.26	40		2004.9	384.302	2004.9	39		2383.91	477.087	2383.91	100
2402.27	296.409	2402.27	12		2660.66	552.765	2660.66	0																						2372.09	512.676	2372.09	41		2622.12	739.921	2622.12	30		2159.12	388.343	2159.12	39		2577.19	464.928	2577.19	96
2573.13	288.736	2573.13	47		2870.49	522.499	2870.49	0																											2622.12	739.921	2622.12	30		2313.34	390.664	2313.34	39		2770.47	451.815	2770.47	85
2744	278.725	2744	57		2870.49	522.499	2870.49	0																																2467.56	384.125	2467.56	41		2963.74	436.494	2963.74	90
2914.87	264.247	2914.87	46																																					2621.79	390.119	2621.79	40		3157.02	419.088	3157.02	100
3085.74	258.399	3085.74	49																																					2776.01	393.953	2776.01	38		3350.3	409.726	3350.3	100
3256.61	246.894	3256.61	38																																					2930.23	400.541	2930.23	37		3543.58	384.987	3543.58	100
3427.48	241.053	3427.48	32																																					3084.46	404.167	3084.46	33		3736.85	351.353	3736.85	100
3427.48	241.053	3427.48	32																																					3238.68	410.056	3238.68	28		3736.85	351.353	3736.85	100
																																								3392.9	418.232	3392.9	23
																																								3547.12	425.713	3547.12	21
																																								3710.67	438.17	3710.67	15
																																								3874.22	440.967	3874.22	31
																																								4037.77	448.639	4037.77	29
																																								4201.31	453.626	4201.31	40
																																								4364.86	458.377	4364.86	40
																																								4528.41	463.129	4528.41	24
																																								4691.96	466.923	4691.96	27
																																								4855.5	468.712	4855.5	31
																																								5019.05	468.284	5019.05	35
																																								5182.6	469.676	5182.6	31
																																								5346.15	467.589	5346.15	24
																																								5509.69	467.787	5509.69	20
																																								5673.24	466.942	5673.24	18
																																								5836.79	467.524	5836.79	19
																																								6000.34	467.815	6000.34	27
																																								6163.89	468.612	6163.89	33
																																								6327.43	470.516	6327.43	42
																																								6490.98	472.719	6490.98	45
																																								6644.45	472.826	6644.45	46
																																								6797.91	473.297	6797.91	47
																																								6951.38	475.35	6951.38	49
																																								7104.84	476.613	7104.84	51
																																								7258.31	477.988	7258.31	51
																																								7411.77	478.698	7411.77	51
																																								7565.24	479.269	7565.24	51
																																								7718.71	478.842	7718.71	57
																																								7872.17	479.723	7872.17	64
																																								8025.64	479.887	8025.64	70
																																								8179.1	479.758	8179.1	58
																																								8332.57	480.36	8332.57	47
																																								8486.03	478.679	8486.03	44
																																								8639.5	477.632	8639.5	42
																																								8792.96	477.127	8792.96	41
																																								8946.43	477.419	8946.43	39
																																								9099.9	475.955	9099.9	37
																																								9253.36	477.123	9253.36	35
																																								9406.83	477.277	9406.83	35
																																								9560.29	477.73	9560.29	34
																																								9713.76	479.172	9713.76	33
																																								9867.22	479.784	9867.22	33
																																								10020.7	481.764	10020.7	34
																																								10174.2	481.344	10174.2	34
																																								10327.6	486.128	10327.6	32
																																								10481.1	489.398	10481.1	30
																																								10637.6	483.359	10637.6	25
																																								10794.2	487.558	10794.2	23
																																								10950.7	491.763	10950.7	20
																																								11107.3	495.749	11107.3	20
																																								11263.8	501.52	11263.8	18
																																								11420.3	510.61	11420.3	21
																																								11576.9	515.718	11576.9	23
																																								11733.4	520.493	11733.4	27
																																								11890	525.298	11890	32
																																								12046.5	529.728	12046.5	37
																																								12203.1	493.573	12203.1	113
																																								12359.6	499.789	12359.6	114
																																								12516.2	505.961	12516.2	115
																																								12672.7	511.811	12672.7	117
																																								12829.2	550.452	12829.2	41
																																								12985.8	509.41	12985.8	119
																																								13142.3	551.135	13142.3	29
																																								13298.9	552.328	13298.9	32
																																								13455.4	551.615	13455.4	34
																																								13612	553.898	13612	33
																																								13768.5	551.79	13768.5	40
																																								13925.1	551.995	13925.1	47
																																								14113	554.286	14113	59
																																								14300.9	549.801	14300.9	72
																																								14488.8	547.228	14488.8	78
																																								14676.8	547.298	14676.8	80
																																								14864.7	542.667	14864.7	75
																																								15052.6	544.225	15052.6	62
																																								15240.6	548.666	15240.6	51
																																								15428.5	546.706	15428.5	58
																																								15616.4	539.549	15616.4	60
																																								15804.4	525.985	15804.4	35
																																								15992.3	530.894	15992.3	35
																																								16180.2	515.119	16180.2	33
																																								16368.2	501.861	16368.2	31
																																								16368.2	501.861	16368.2	31
[truncated: 8 more columns]
